# Supplementary material
Source: PubMed Central journal article supplement (PMC5692581)

## Supporting Information

### **The large G protein alpha-subunit XL $\alpha$ s limits clathrin-mediated endocytosis and regulates tissue iron levels in vivo**

Qing He<sup>a</sup>, Richard Bouley<sup>b</sup>, Zun Liu<sup>a</sup>, Marc N. Wein<sup>a</sup>, Yan Zhu<sup>a</sup>, Jordan M. Spatz<sup>a</sup>, Chia-Yu Wang<sup>b</sup>, Paola Divieti Pajevic<sup>a,c</sup>, Antonius Plagge<sup>d</sup>, Jodie L. Babitt<sup>b</sup>,  
and Murat Bastepe<sup>a,1</sup>

<sup>a</sup>Endocrine Unit, <sup>b</sup>Program in Membrane Biology, Department of Medicine and Division of Nephrology, Massachusetts General Hospital and Harvard Medical School, Boston, MA 02114; <sup>c</sup>Department of Molecular and Cell Biology, Boston University Henry M. Goldman School of Dental Medicine, Boston, MA 02118; <sup>d</sup>Department of Cellular and Molecular Physiology, Institute of Translational Medicine University of Liverpool, Liverpool, UK L69 3BX.

\*Address correspondence to: Murat Bastepe, MD, PhD  
Endocrine Unit, Massachusetts General Hospital  
50 Blossom St. Thier 10  
Boston, MA 02114  
Email: [bastepe@helix.mgh.harvard.edu](mailto:bastepe@helix.mgh.harvard.edu)

### Supplementary Table S1

Proteins identified by the preliminary proteomic screen selectively from purified lysates of C3H10T1/2 cells transduced with adenovirus encoding FLAG-tagged mouse XL $\alpha$ s; control cells were transduced with adenovirus encoding yellow fluorescent protein.

| <u>Gene Accession</u>   | <u>Protein</u>    | <u>Function</u>                        |
|-------------------------|-------------------|----------------------------------------|
| Gnas_IPI:IPI00119853.1  | XL $\alpha$ s     | The Bait                               |
| Gnas_IPI:IPI00471141.2  | ALEX              | Unknown (interacts with XL $\alpha$ s) |
| Gnb1_IPI:IPI00120716.3  | Gbeta subunit 1   | G protein subunit                      |
| Gnb1_IPI:IPI00120716.3  | Gbeta subunit 3   | G protein subunit                      |
| Gng10_IPI:IPI00110583.1 | Ggamma subunit 10 | G protein subunit                      |
| Snx9_IPI:IPI00313275.7  | Sorting nexin 9   | Endocytosis                            |
| Dnm1_IPI:IPI00272878.6  | Dynamin-1         | Endocytosis                            |
| Dnm2_IPI:IPI00131445.2  | Dynamin-2         | Endocytosis                            |

**Supplementary Table S2**

sgRNA targeting sequences used to knockout mouse XL $\alpha$ s in this study.

| No. | Spacer Sequence (5'-3') | Reverse Complement(5'-3') |
|-----|-------------------------|---------------------------|
| 1   | CTACTCCGCGGCCTCCTCCG    | CGGAGGAGGCCGCGGAGTAG      |
| 2   | TTGCTGACCCGCCTACTCCG    | CGGAGTAGGCGGGTCAGCAA      |
| 3   | TGGCCTGCCCGGAGCCACA     | TGTGGCTCCGGGGCAGGCCA      |

### Supplementary Table S3

DNA sequences of wild-type and mutant clones. The guide sequences are marked in yellow. Deletions are shown as dotted line, and insertion is show in red.

#### sgRNA1

WT TGCTGACCCGCCTACTCCGCGGCCTCCTCCGCGGCCGACTGCCTGG  
KO1 TGCTGACCCGCCTACTCCGCGGCCTCCTCCGC--CCGACTGCCTGG  
TGCTGACCCGCCTACTCCGCGGCCTCCGTGCG---CGACTGCCTGG

#### sgRNA2

WT AGGTTGCTGACCCGCCTACTCCGCGGCCCTCCTCCGCGCGGCCGACTG  
KO2 AGGTTGCTGAC-----TG  
AGGTTGCTGACCCGCCTA-----CGGCCCTCCTCCGCGCGGCCGACTG  
KO3 AGGTTGCTGACCCGCCTA-TCCGCGGCCCTCCTCCGCGCGGCCGACTG  
AGGTTGCTGACCCGCCTACT-----TCCGCGCGGCCGACTG

#### sgRNA3

WT CGAAACCGCCC TGGCCTGCCCGGAGCCACA CGGTCGGGAGCAAC  
KO4 CGAAACCGCCCTGGCCTGCCCGGAGCC-CACGGTCGGGAGCAAC  
CGAAACCGCCCTGGCCTGCCCG-----CACACGGTCGGGAGCAAC

## Supplementary Figure Legends:

**Supplementary Figure S1.** XLAs can be co-immunoprecipitated with SNX9 and Dnm2. Skeletal muscle tissue lysates from P0 WT mice were immunoprecipitated with anti-XLAs, anti-Dnm2, or anti-SNX9 antibodies, and then, immunoblot was performed using XLAs antiserum. Goat IgG and the rabbit IgG served as negative controls for immunoprecipitation. Skeletal muscle tissue lysates from P0 WT and XLKO mice were used for immunoblotting to identify the specific XLAs band.

**Supplementary Figure S2.** Sequence traces obtained from the different XLAs knockout clonal cells. (A) KO1, (B) KO2, (C) KO3 and (D) KO4. Blue arrows indicate the locations of the introduced mutations; note that each Gnas allele in a clonal cell is mutated differently, leading to two overlapping sequence traces.

**Supplementary Figure S3.** Ablation of XLAs induces transferrin/iron uptake. (A) WT or XLKO Ocy454 cells were untreated or treated with transferrin-Alexa Fluor 568 for 30 min, and then analyzed by flow cytometry to determine the amount of transferrin uptake. Gated events are shown as overlaid histograms of transferrin-Alexa Fluor 568 fluorescence (x-axis) against the number of events (y-axis). (B) Primary cardiomyocytes from P2 WT and XLKO pups were untreated or treated with transferrin-Alexa Fluor 568 for 30 min, and then analyzed by flow cytometry. (C) Iron overload-induced apoptosis is increased in the absence of XLAs. Primary cardiomyocytes from WT and KO mice were untreated or treated with FeCl<sub>3</sub> for 72 hours, followed by annexin V/PI flow cytometry assay for determining apoptotic cell population.

**Supplementary Figure S4.** Overexpression of XLAs represses SNX9 expression. (A) After transfection with XLAs-GFP, GFP- and GFP+ cell populations were selected via flow cytometry. (B) Sorted GFP- and GFP+ cells were immunoblotted with SNX9 antibody. (C) Densitometric analysis of the relative abundances of SNX9 in GFP- and GFP+ cells. Data are mean ± SEM of two independent experiments (n=6 per group). \*\*, p<0.01.

**Supplementary Figure S5.** Suppression of SNX9 rescues enhanced transferrin uptake in XLKO Ocy454 cells. WT and XLKO Ocy454 cells were transfected with (A) control siRNA, or (B) SNX9 siRNA. siRNA-transfected Ocy454 cells were untreated or treated with transferrin-Alexa Fluor 568 for 30 min, and then analyzed by flow cytometry for transferrin uptake.

**Supplementary Figure S6.** Overexpression of XLAs prevents internalization of PTHR. PTHR was co-transfected with (A) Gsα-GFP, or (B) XLAs-GFP in HEK293T cells. The cells were treated for 5 min with PTH-TMR (10nM), which results in receptor internalization. (C, D) A line intensity profile across the cell was obtained in a given image. Representative intensity profiles are shown in the right.

**Supplementary Figure S7.** TIRF microscopy analysis detecting PTHR on the cell surface in XLas-GFP or Gs $\alpha$ -GFP overexpressed cells. HEK293T transfected with PTHR-dsRed and (A) Gs $\alpha$ -GFP, or (B) XLas-GFP were monitored for green and red fluorescent signals in live cells by TIRF microscopy for 50 min after PTH(1-34) (10 nM) stimulation. Quantification of fluorescence intensities in (C) Gs $\alpha$ - and (D) XLas-overexpressing cells. Data are mean  $\pm$  SEM of 8 different cells from three independent experiments.

**Supplementary Figure S8.** HEK293T cells co-transfected with plasmids encoding V2R and either Gs $\alpha$ -GFP or XLas-GFP were treated with VP-TMR (1  $\mu$ M) for 5 min. Confocal analysis of (A) Gs $\alpha$ -GFP, or (B) XLas-GFP transfected HEK293T cells. (C, D) Fluorescence intensities along the white lines in A and B were plotted as intensity histograms. (E) Relative ratios of fluorescence intensity between plasma membrane and cytosolic area of TMR and GFP were quantified by ImageJ by dividing the plasma membrane intensity to the cytosolic fluorescence intensity. Data are mean  $\pm$  SEM of from ten different cells. \*P < 0.05.

**Supplementary Figure S9.** Ablation of XLas enhances PTHR internalization. Primary cardiomyocyte from WT and XLKO mice were transfected with PTHR plasmid, and subsequently treated with PTH-TMR for 1 min (A, B), 5 min (E, F), 15 min (G, H), and 30 min (J, K). Scale bar, 10 $\mu$ m. (C) Quantification of fluorescence intensities of cytosol and total cell in WT and KO cells after 1 min PTH-TMR treatment. Yellow line outlines outside of the cell, and blue line marks the estimated cytosolic region. (D) Relative ratio of fluorescence intensity between cytosolic and total cell area of PTHR was quantified by dividing the cytosolic intensity to the total intensity, using ImageJ. Data are mean  $\pm$  SEM from fifteen different cells. (I) Percentage of cells with perinuclear PTH-TMR signal in WT and KO cells after 15 min treatment. 48-65 cells were randomly selected per group for quantification. Data are mean  $\pm$  SEM from three independent experiments. \*, p<0.05; \*\*, p<0.01.

**Supplementary Figure S10.** ALEX(-)XLas mutant inhibits transferrin uptake and PTHR internalization. (A) Confocal microscopy analysis of ALEX(-)XLas-GFP expressing cells incubated with transferrin-Alexa Fluor 568 for 30 min. (B) Confocal microscopy analysis of PTHR internalization in ALEX(-)XLas-GFP expressing cells. (C) Representative plots on transferrin uptake in ALEX(-)XLas-GFP transfected HEK293T cells. (D) Quantification of the median values of transferrin-Alexa Fluor 568 in GFP+ and GFP- cell populations. Data are mean  $\pm$  SEM of three independent experiments (n=9 per group). \*, p<0.05.

Supplementary Fig. S1

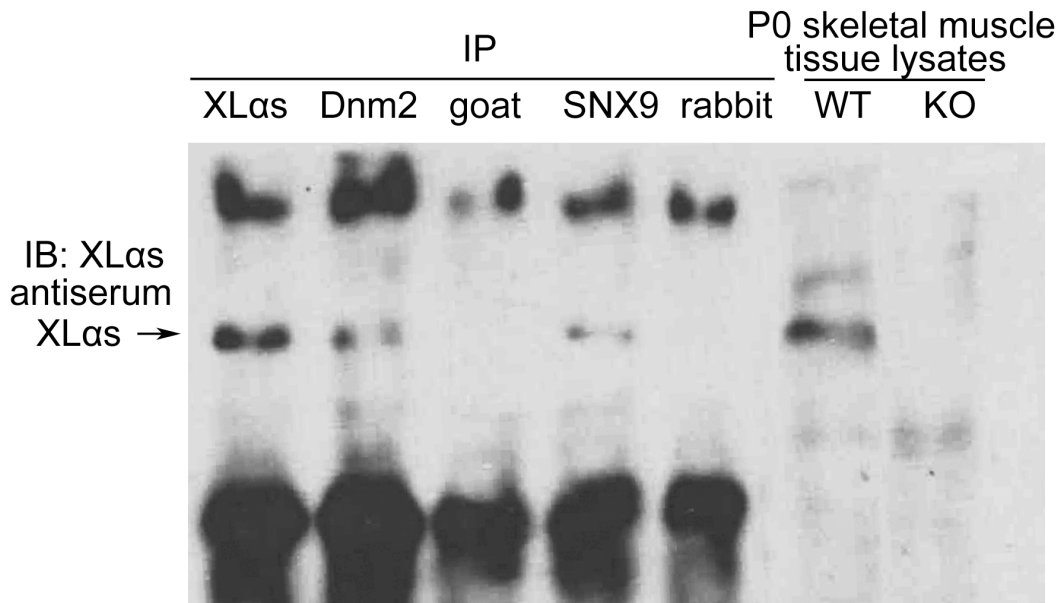

Supplementary Fig. S2

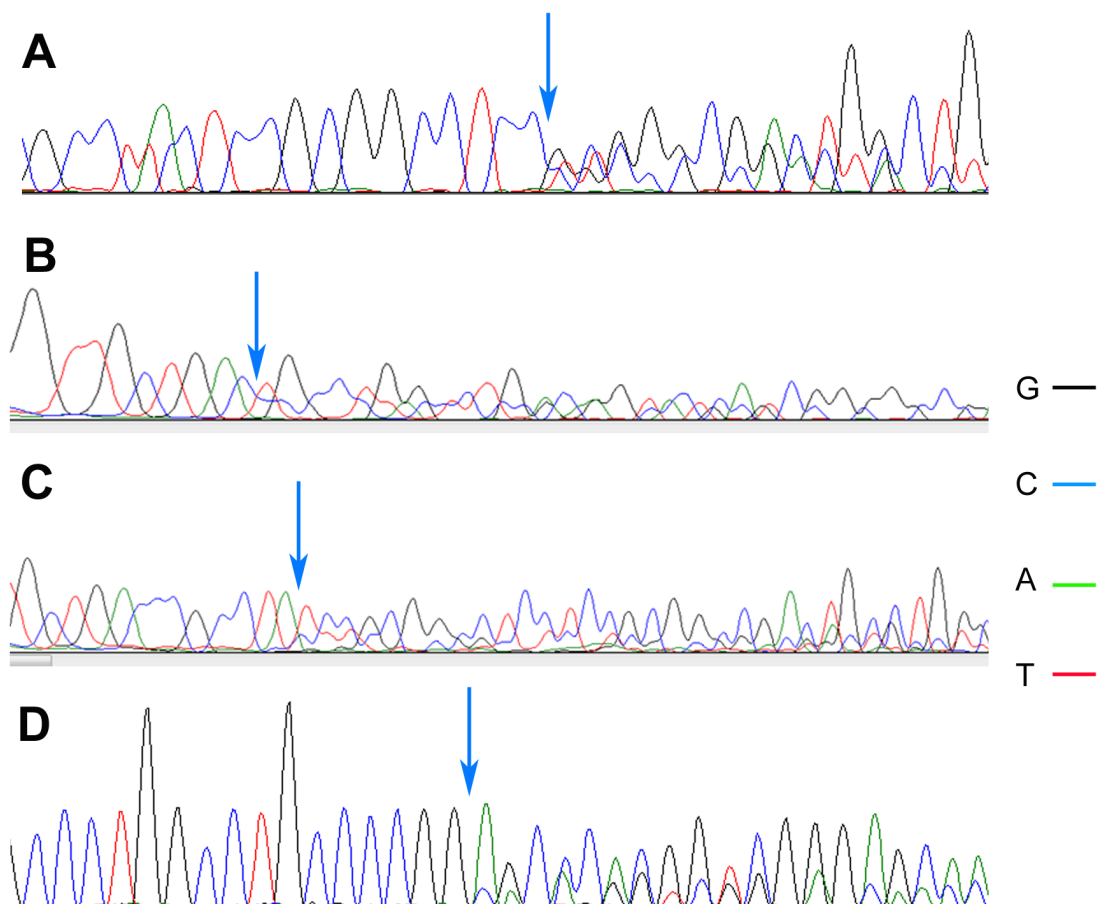

### Supplementary Fig. S3

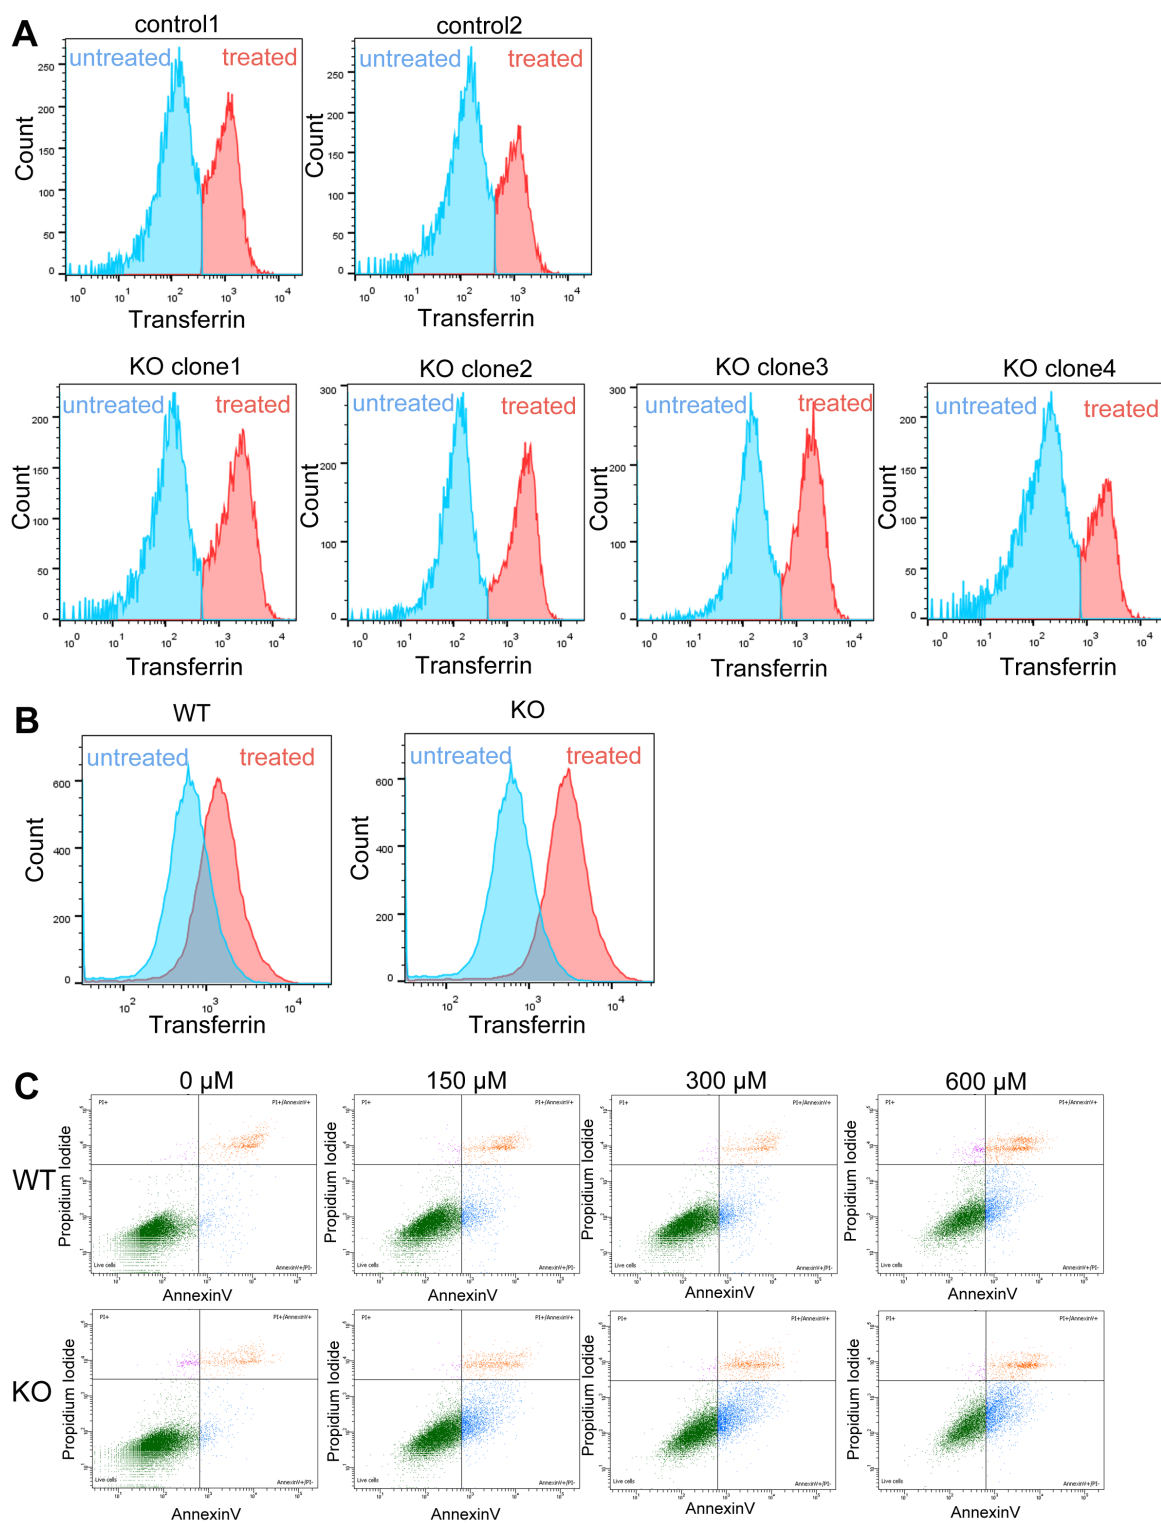



## Supplementary Fig. S4

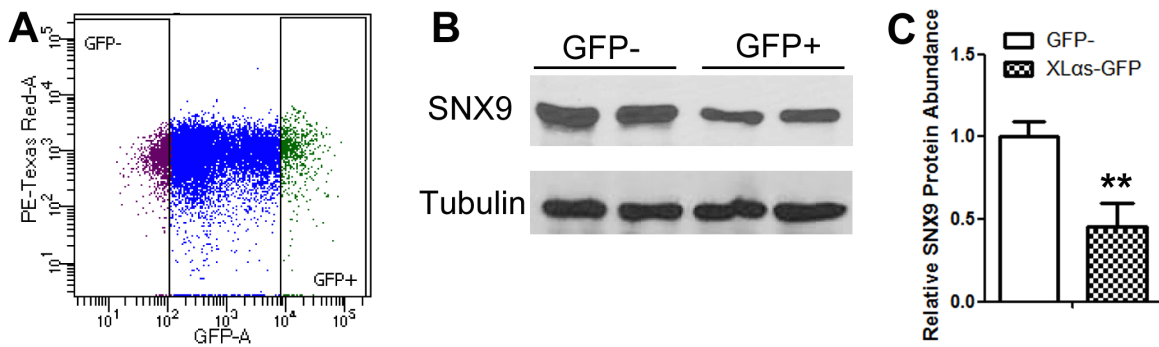

## Supplementary Fig. S5

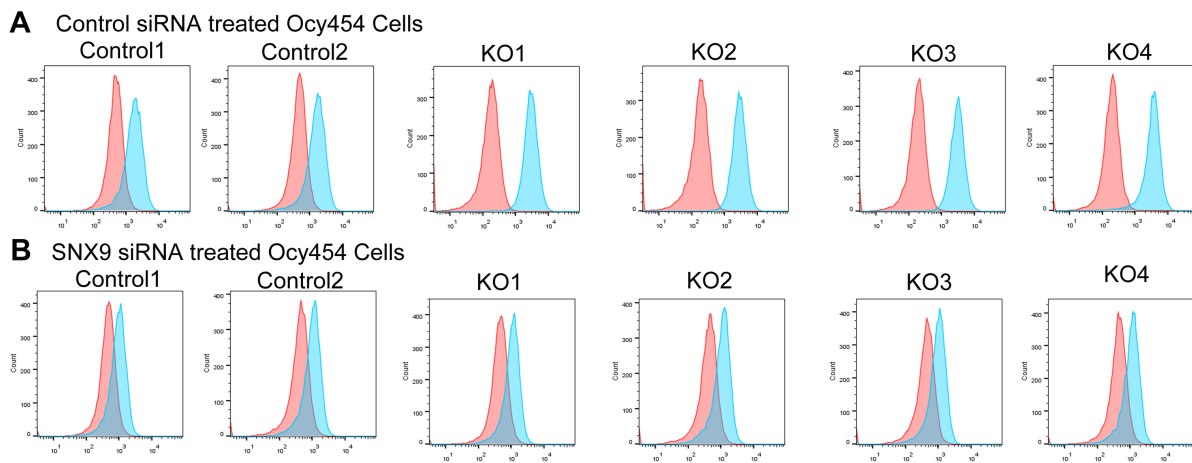

### Supplementary Fig. S6

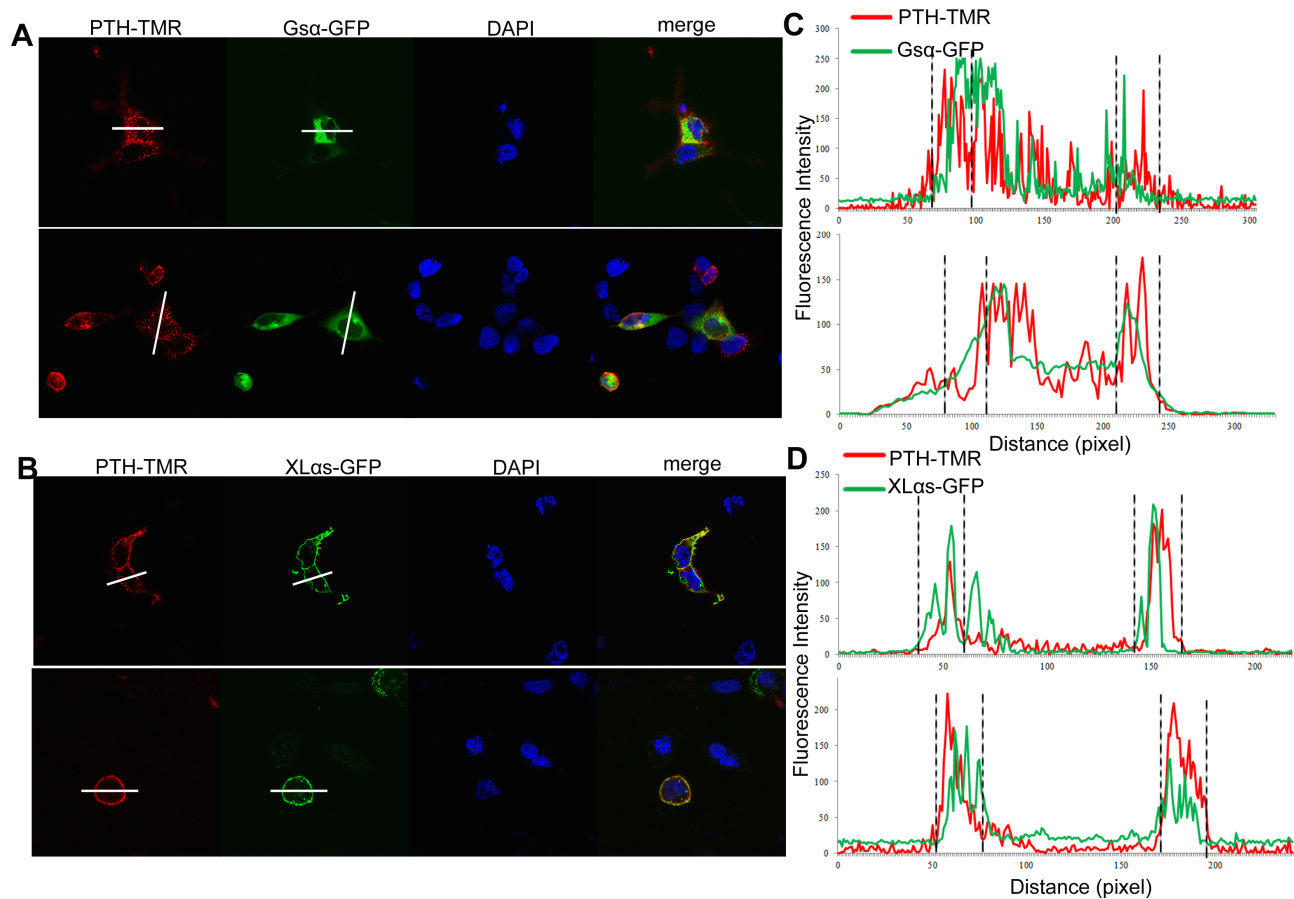

### Supplementary Fig. S7

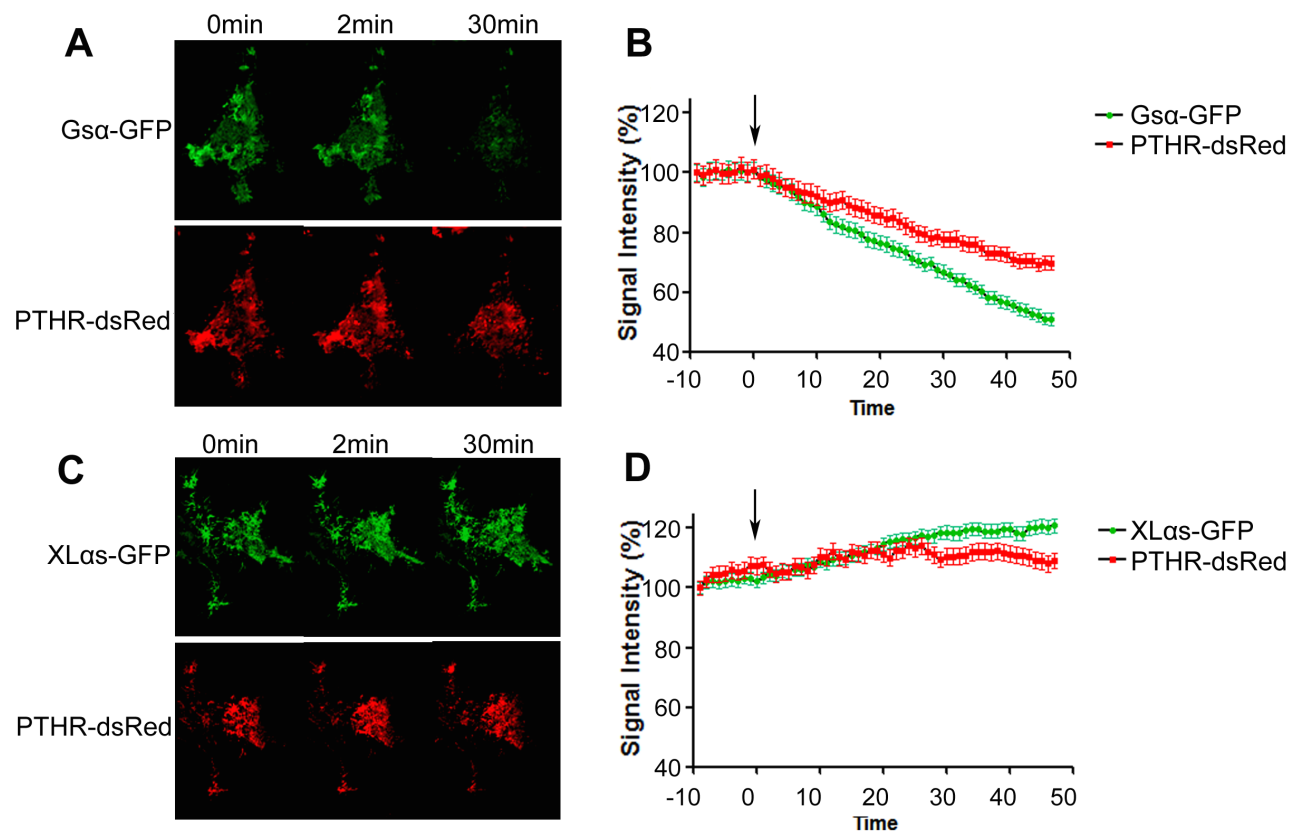

Supplementary Fig. S8

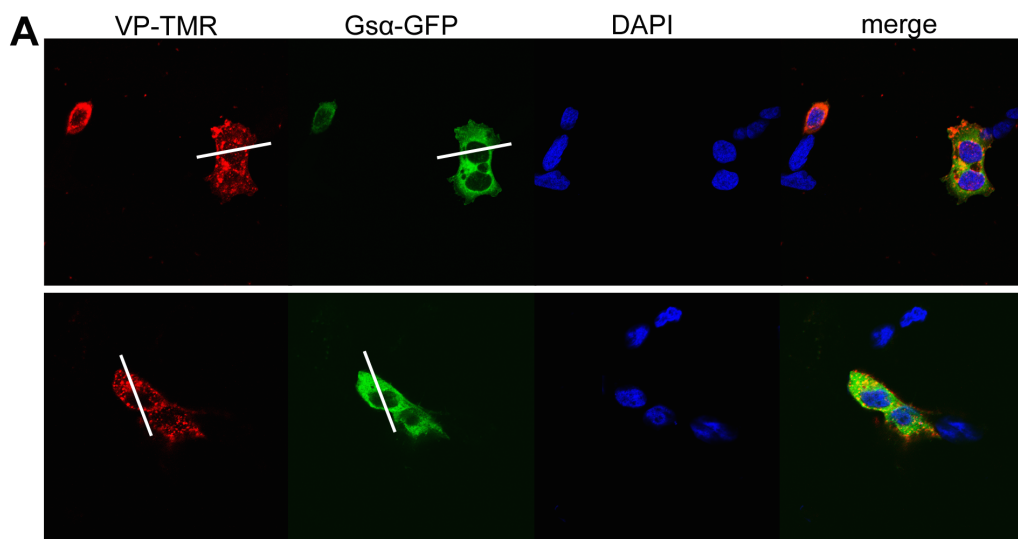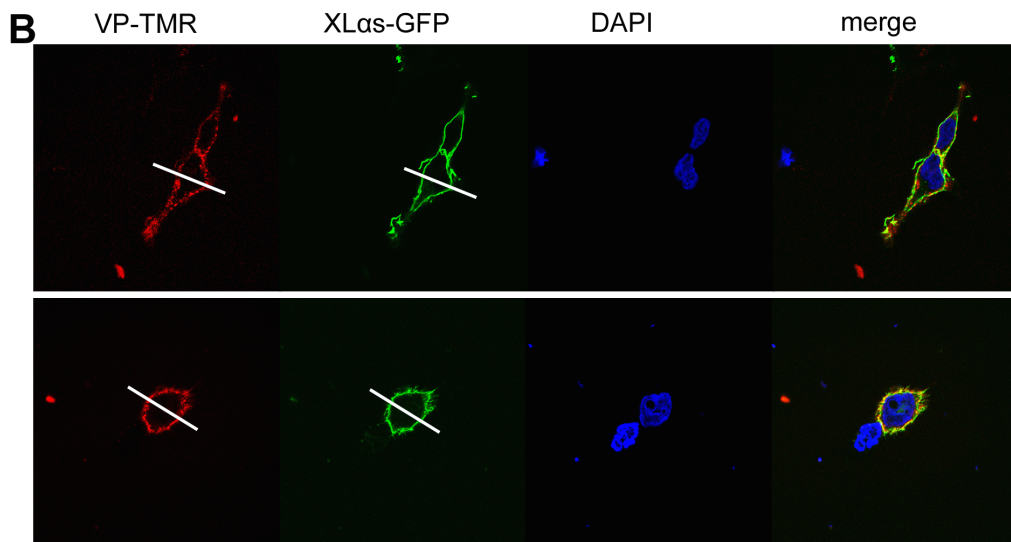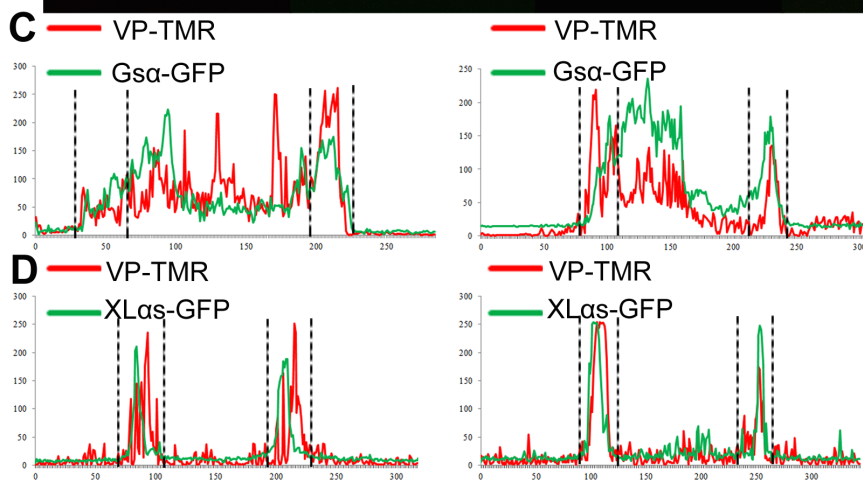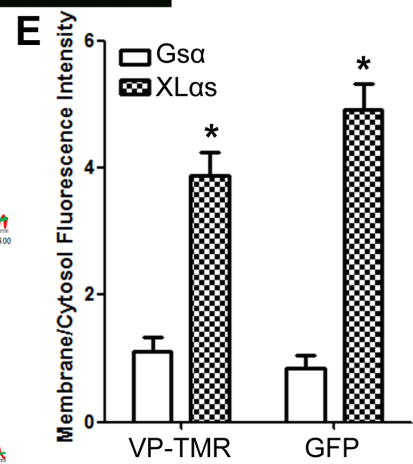

## Supplementary Fig. S9

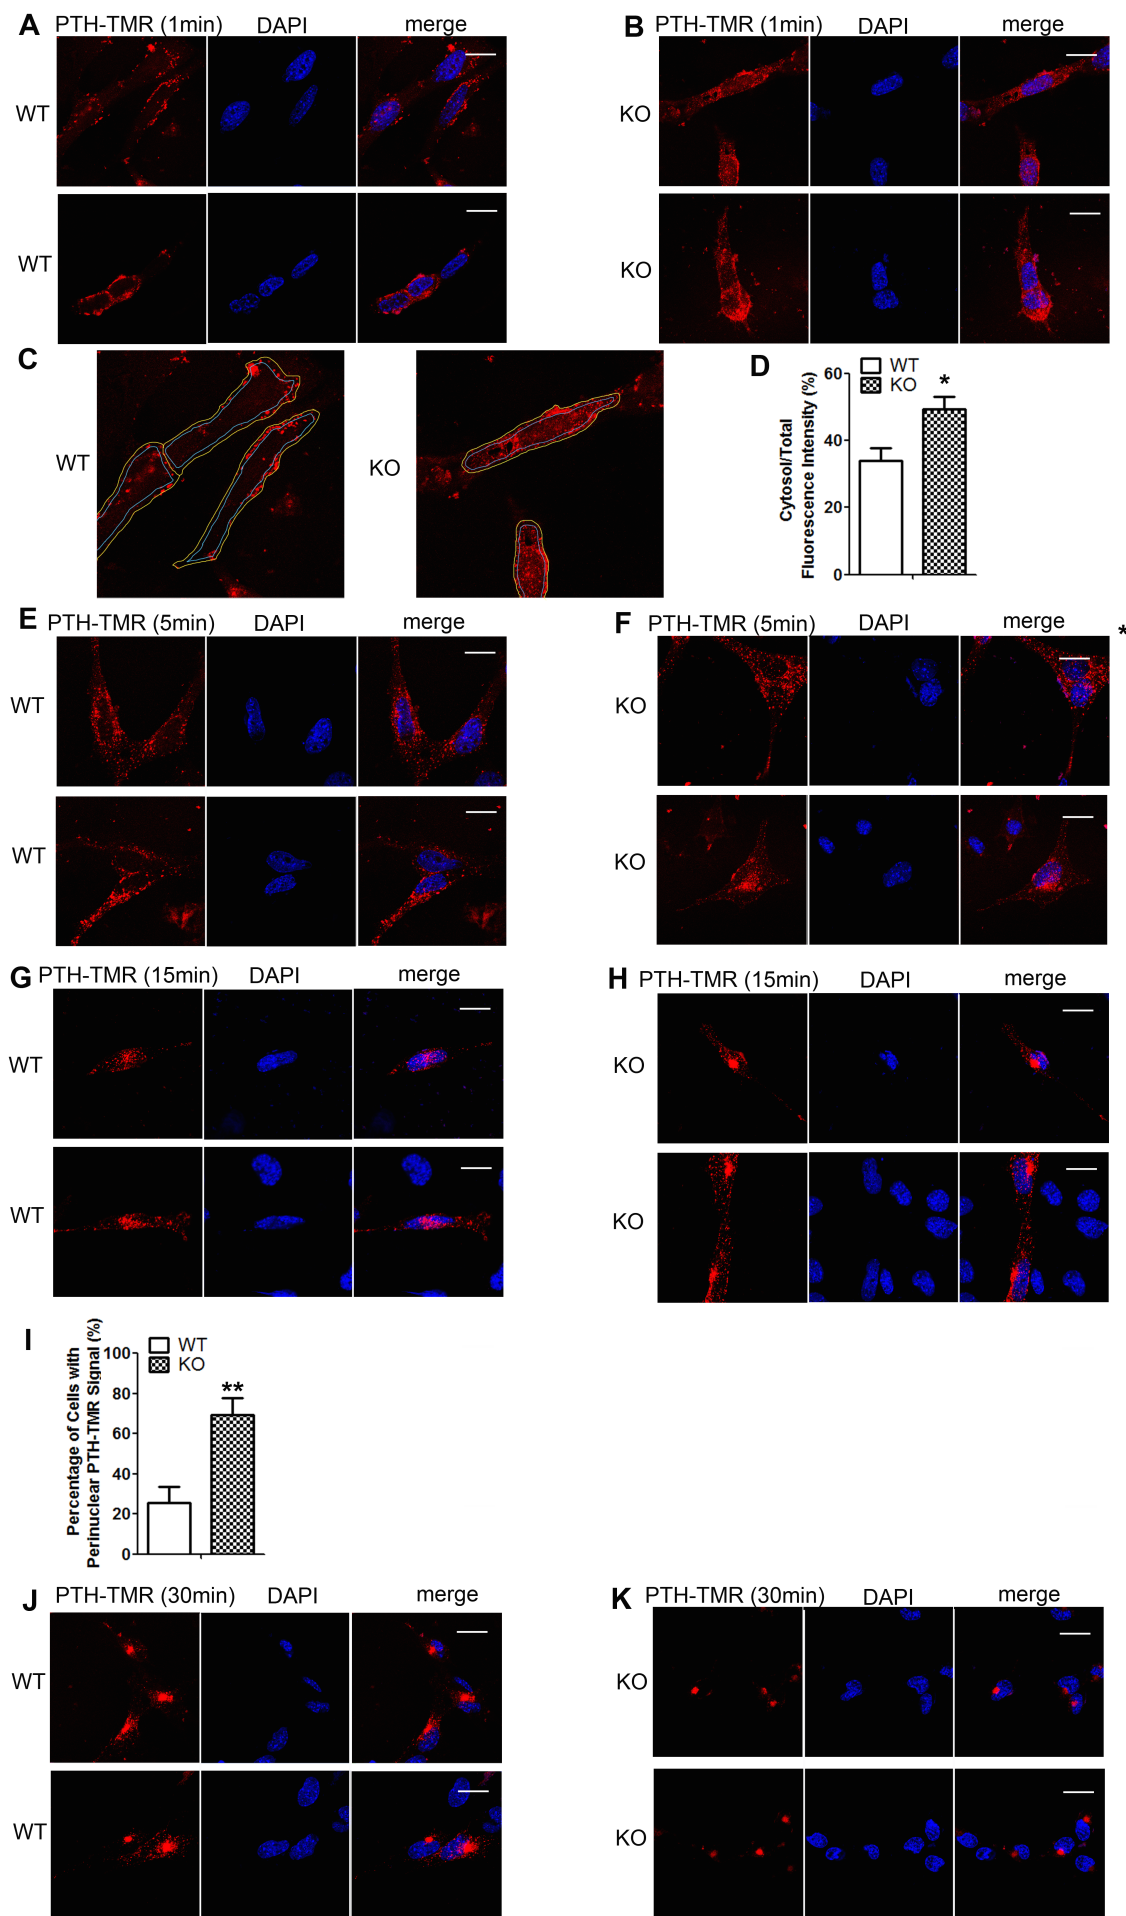

Supplementary Fig. S10

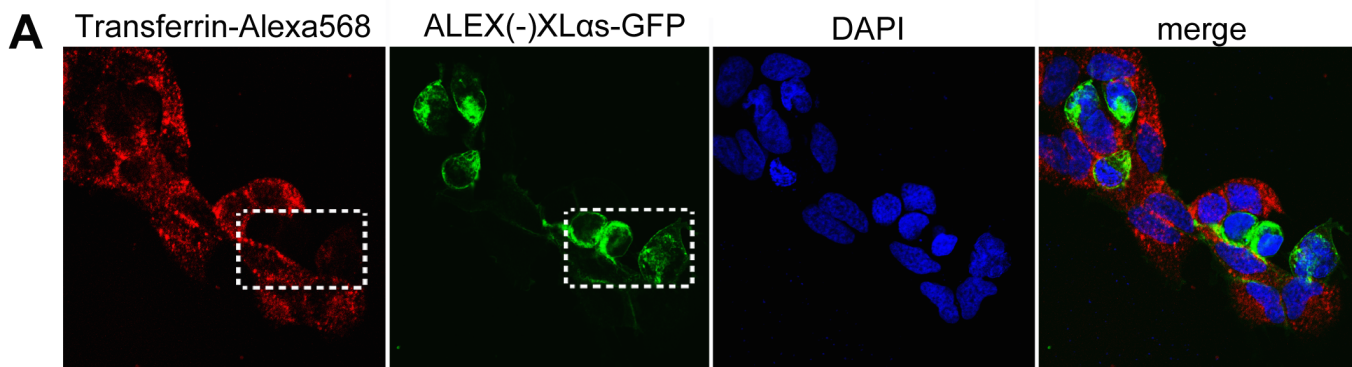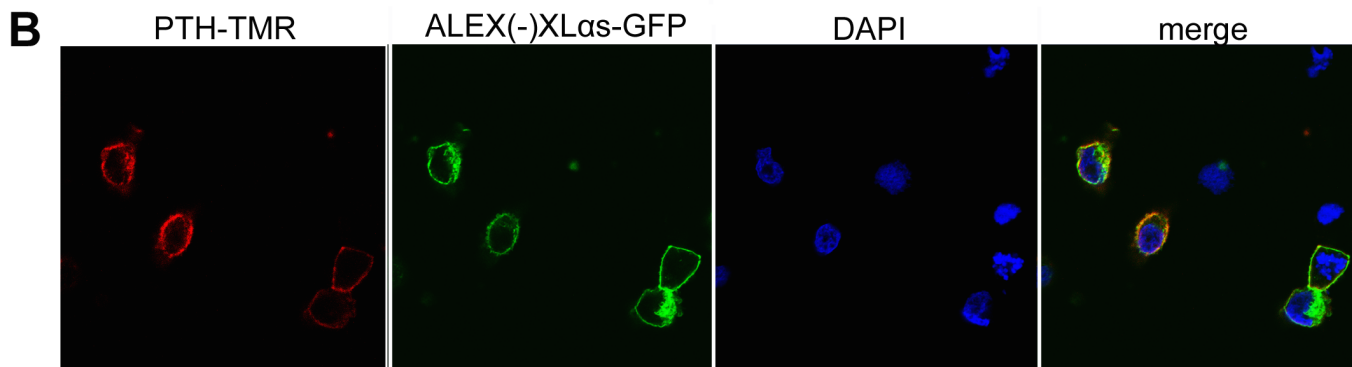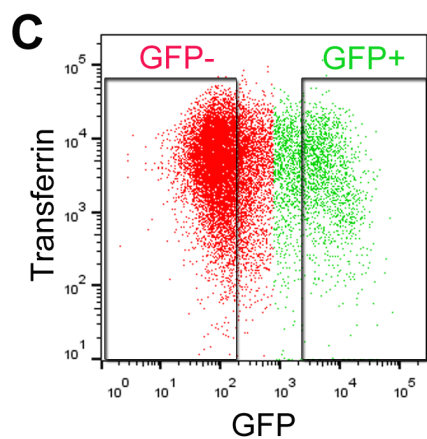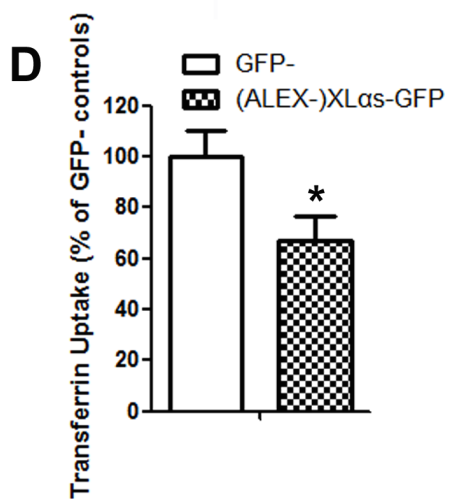

Supplement: pnas.1712670114.sapp.pdf [file pnas.1712670114.sapp.pdf]
